# Supplementary material for: Molecular Properties of Flammulina velutipes Polysaccharide–Whey Protein Isolate (WPI) Complexes via Noncovalent Interactions
Source: MDPI journal article supplement (doi:10.3390/foods10010001), 2020-12-22
Supplement: s1 [file s1]

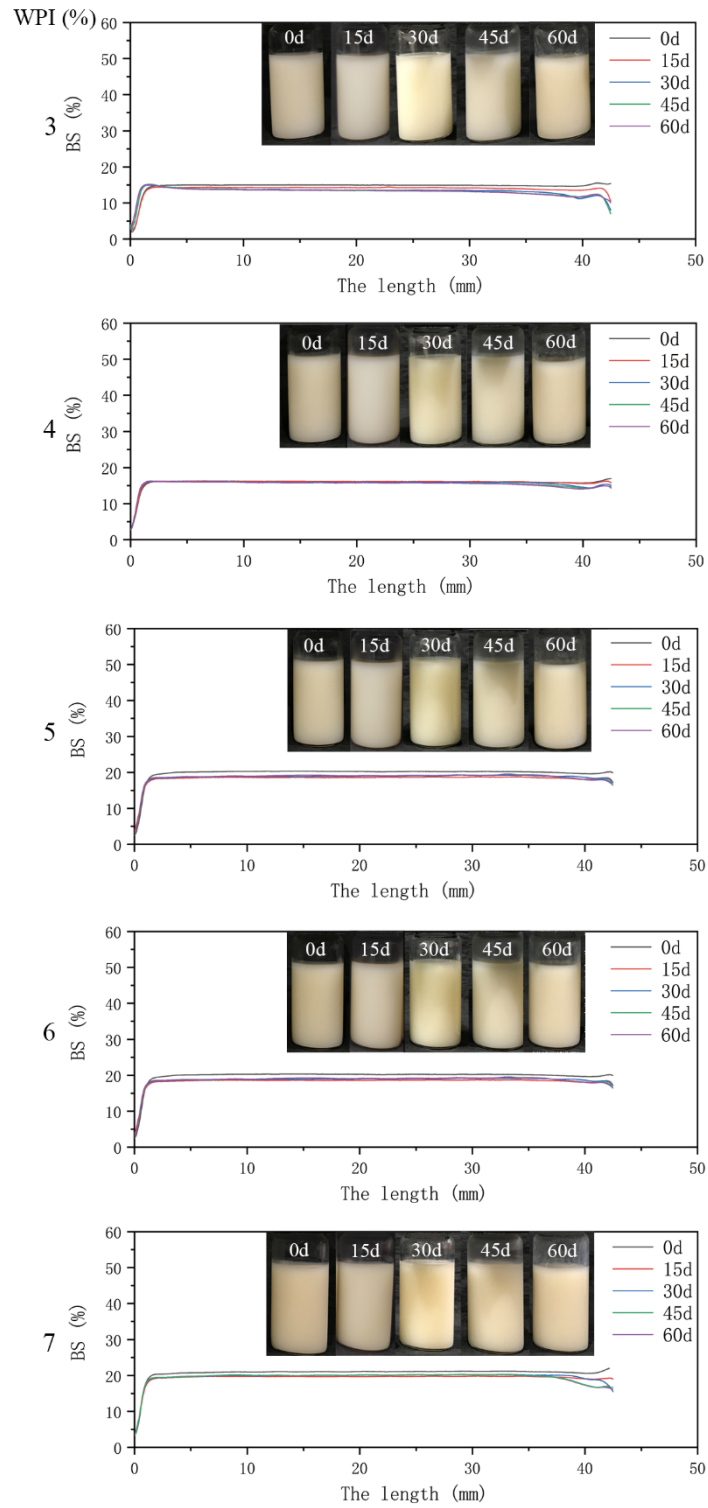

**Figure 1.** Images and Back scattering (BS) of FVP-WPI solutions over 60 d of storage.
